1 COVID-19 epidemics monitored through the logarithmic growth rate and SIR model

2

3 Tomokazu Konishi

4 Graduate school of bioresource sciences, Akita Prefectural University

5

6 **Abstract**

7 **Background.**

8 The SIR model is often used to analyse and forecast the expansion of an epidemic. In this model,  
9 the number of patients exponentially increases and decreases, resulting in two phases. Therefore,  
10 in these phases, the logarithm of infectious patients changes at a constant rate, the logarithmic  
11 growth rate  $K$ . However, in the case of the coronavirus disease 2019 (COVID19) epidemic,  $K$   
12 never remains constant but increases and decreases linearly; therefore, the SIR model does not fit  
13 that seen in reality. We would like to clarify the cause of this phenomenon and predict the  
14 occurrence of COVID19 epidemics.

15

16 **Methods.**

17 We simulated a situation in which smaller epidemics were repeated with short time intervals. The  
18 results were compared with the epidemic data from 279 countries and regions.

19

20 **Results.**

21 In the simulations, the  $K$  values increased and decreased linearly, similar to the real data.  
22 Because the previous peak covered the initial increase in the epidemic,  $K$  did not increase as  
23 much as expected; rather, the difference in the basic reproduction number  $R_0$  appeared in the  
24 slope of increasing  $K$ . Additionally, the mean infectious time  $\tau$  appeared in the negative peaks of  
25  $K$ . By using the  $R_0$  and  $\tau$  estimated from the changes in  $K$ , changes in the number of patients  
26 could be approximated using the SIR model. This supports the appropriateness of the model for  
27 evaluating COVID-19 epidemics. By using the model, the distributions of the parameters were  
28 identified. On average, an epidemic started every eleven days in a country. The worldwide mean  
29  $R_0$  was 2.9; however, this value showed an exponential character and could thus increase  
30 explosively. In addition, the average  $\tau$  was 12 days; this is not the native value but represents a  
31 shortened period because of the isolation of patients. As  $\tau$  represents the half-life, the infectious  
32 time varies among patients; hence, prior testing should be performed before isolation is lifted.  
33 The changes in  $K$  represented the state of epidemics and were several weeks to a month ahead  
34 of the changes in the number of confirmed cases. In the actual data, when  $K$  was positive on  
35 consecutive days, the number of patients increased a few weeks later. In addition, if the negative  
36 peaks of  $K$  could not be reduced to as small as 0.1, the number of patients remained high. Thus,

**NOTE: This preprint reports new research that has not been certified by peer review and should not be used to guide clinical practice.**

37 the number of  $K$ -positive days and mean infectious time had a clear correlation with the total  
38 number of patients. In such cases, mortality, which was lognormally distributed, with a mean of  
39 1.7%, increased. To control the epidemic, it is important to observe  $K$  daily, not to allow  $K$  to  
40 remain positive continuously, and to terminate a peak with a series of  $K$ -negative days. To do  
41 this, it was necessary to shorten  $\tau$  by finding and isolating a patient earlier. The effectiveness of  
42 the countermeasures is apparent in  $\tau$ . The effect of vaccination, in terms of controlling the  
43 epidemic, was limited.

44

45

## 46 **Introduction**

47 An epidemic can be analysed through various approaches, but it is often described using the  
48 susceptible-infectious-recovered (SIR) model, which estimates the changes in the number of  
49 susceptible ( $S$ ), infectious ( $I$ ), and recovered ( $R$ ) people (Rahimi et al. 2021). This model explains  
50 the kinetics by representing the speed of change in the number of corresponding individuals using  
51 simultaneous differential equations. This is the most basic mathematical model used in modern  
52 epidemiology and is the basis for a family of models that considers more detailed conditions, such  
53 as the SEIR model, which includes the exposed ( $E$ ) patients, considering the latency period (Heng  
54 & Althaus 2020). An explanation for the SIR model is provided in the Materials and Methods  
55 section.

56  
57 According to the SIR model, the number of infected people increases exponentially until the  
58 fraction of susceptible individuals diminishes and then decreases by half at each constant period.  
59 In each exponential increase or decrease phase, the logarithms of  $I$  change linearly over time. The  
60 logarithmic growth rate,  $K$ , indicates the slope of the linear change. Therefore, it should take a  
61 constant value in both the stable phases.

62  
63 However, as far as coronavirus disease 2019 (COVID-19) cases are concerned,  $K$  increases and  
64 decreases in a linear fashion and never remains constant; therefore, the actual cases do not directly  
65 fit this model (Konishi 2021a). This conflict raises questions about the use of SIR and related  
66 models to understand and predict the status of the COVID-19 epidemic. This could be because  
67 variants of severe acute respiratory syndrome coronavirus 2 (SARS-CoV-2) repeat in short  
68 intervals with small epidemics that target only a limited population; if the next peak arrives before  
69 the previous peak converges, then the early stages of exponential increase will be masked by the  
70 previous one. If so, the biphasic pattern is altered. To test this possibility, in this study, simulations  
71 were performed and compared with the actual data of the epidemics using exploratory data  
72 analysis (Tukey 1977).

73  
74 Here, we used the basic SIR model exclusively for the following reasons: First, the latency period  
75 of the SIER model may differ among patients, but it is rarely measured because the infectious  
76 time is difficult to identify (Guan et al. 2020; Lauer et al. 2020; Li et al. 2020). It is also difficult  
77 to estimate the number of infections from the data because the effect is indistinguishable from  
78 other parameters that affect the speed. By presuming a common half-life of exposed patients, the  
79 SEIR model can also be applied; however, this approach increases the assumptions that are  
80 difficult to prove (Ellis & Silk 2014). In addition, the latency period in COVID-19 is probably  
81 not long because the infectious phase starts before the symptoms appear.

82

## 83 **Materials and methods**

### 84 Simulating the SIR model

85 Here, the model (Rahimi et al. 2021) was modified slightly to correspond to the number of  
86 people rather than the percentage. Infection occurs when an infectious person contacts a  
87 susceptible person at a constant expectation of infection,  $\beta$ , per day. This reduces the number of  
88  $S$ . Hence,  $dS/dt = -\beta I \times S/P$ , 1

89 where  $P$  is the total population. The expectation is  $\beta = R_0/\tau$ , where  $R_0$  is the basic reproduction  
90 number, which shows the expected number of each infectious person infected in a suitable  
91 condition,  $S/P \approx 1$ .  $\tau$  is the mean infectious time; the length was set to five days in the  
92 simulations (Alene et al. 2021). The reduced number from  $S$  represents infectious patients,  
93 which will be reduced at a constant rate  $1/\tau$ ,

$$94 \quad dI/dt = \beta IS/P - I/\tau. \quad 2$$

95 The reduced number represents the recovered individuals as

$$96 \quad dR/dt = I/\tau. \quad 3$$

97 Equations 1–3 represent the model. According to equation 2, when  $S/P \approx 1$  and  $S/P \approx 0$ ,  $dI/dt$   
98 becomes a first-order reaction of  $I$ ; hence,  $I$  increases and decreases exponentially, respectively  
99 (IUPAC 2021). Therefore, a peak was formed (Fig. 1A, blue). The R system (R Core Team 2020)  
100 was used to simulate the differential equations. The R code used is shown in Figshare (Konishi  
101 2021b).

102

103 The logarithmic growth rate  $K$  (Konishi 2021a) is the slope of the logarithm of the exponential  
104 change  $I$  (Fig. 1B, blue). Because the slope is constant,  $K$  should also be the same (black). Here,  
105 it is defined as  $K = d(\log_2 I)/dt$ . Because 2 was used as the base of the logarithms instead of  $e$ ,  
106  $1/|K|$  shows the doubling time ( $K > 0$ ) or half-life ( $K < 0$ ), directly.  $R_0$  is a value that depends on  
107 the SIR model and is affected by  $\tau$ , while  $K$  is a more physically determined parameter that is  
108 independent of the model and valid as long as the subject changes exponentially. When  $S/P \approx 0$   
109 ( $K < 0$ ), the number of patients after  $t$  days will be  $2^{-t/\tau} = 2^{Kt}$  times. This results in  $\tau = 1/(-K)$ .  
110 When  $S/P \approx 1$  ( $K > 0$ ), the number of patients after  $t$  days becomes  $R_0^{t/\tau} = 2^{Kt}$  times. This results  
111 in  $R_0 = 2^{K\tau}$ .

112

113 Note that when  $R_0$  is low, the exponential infection stops, leaving some  $S_0$  uninfected. From  
114 equation 2, we obtain  $dI/dt = (\beta S/P - 1/\tau) I$ . 2'

115 When  $\beta S/P - 1/\tau > 0$ , an exponential increase was observed. Because  $\beta = R_0/\tau$ , this can be  
116 transformed to  $R_0 > P/S$ . This results in  $S > P/R_0$ , which shows the limit of the exponential increase,  
117 but this does not directly represent the number of people who can escape the infection, as the

118 infection may continue after the exponential increase and vice versa. For example, the simulation  
119 showed that 70% and 20% of people may be left uninfected when  $R_0$  is 2 and 3, respectively (Fig.  
120 S1).

121

122 Because the simulation results in exponentially varying outcomes, the calculations were  
123 somewhat unstable, resulting in differences between the input and output parameters. Therefore,  
124 we used the calculation results (Fig. 1, black) to estimate  $R_0$  and  $\tau$  values in the simulation; for  
125 example, in the case of Fig. 1,  $K$  took two constant phases at 0.4 and -0.2; hence,  $\tau = 1/(-0.2) =$   
126  $5$  and  $R_0 = 2^{0.4*5} = 4$ . The instability was especially apparent in the condition of input  $R_0 < 2$ . Under  
127 such conditions, the exponential increase was likely to stop, leaving many  $S_0$  uninfected (Fig. S1),  
128 and the computational values of  $\tau$  and  $R_0$  tended to increase. This is a kind of artificial error, but  
129 unfortunately, it was unavoidable even when using alternative codes, such as the deSolve package  
130 (Soetaert et al. 2010). Thus,  $R_0 \ll 2$  is difficult to reproduce.

131

132 The closer the peaks are to each other or the wider they are, the negative peak of  $K$  is higher (Fig.  
133 2B and 2C). This effect was simulated as follows. For a given  $R_0$ , we set various mean infection  
134 times and estimated a single peak of  $I$  using the SIR model. Bimodal peaks were artificially  
135 synthesised by superimposing the peaks at intervals of 40 d. As discussed later with real data, this  
136 interval is longer than the ordinal condition but is a possible length. The negative peak sandwiched  
137 between two identical peaks was measured, and  $\tau$  was estimated as  $1/(-K)$  and then compared to  
138 the original constant phase. It was confirmed that  $R_0$  did not move significantly during the  
139 simulation to change  $\tau$ . At each  $R_0$ , simulations were performed until the peaks were too close  
140 together, and the valleys were no longer observed.

141

142 We simulated the effect of  $\tau$  on the estimation of  $R_0$  from the peak of  $K' \equiv dK/dt$ . A series of  $R_0$   
143 values were set under a certain  $\tau$ , and the peak of  $I$  was estimated using the SIR model. These  
144 peaks were superimposed 20 days after the peak at  $\tau = 5$  and  $R_0 = 5$ . The  $K$  and  $K'$  values were  
145 calculated from the synthesized bimodal peaks, and the slope of the rising edge of the latter  $K$   
146 peak was estimated from the peak of  $K'$ . This  $K'$  value was compared with the  $R_0$  of the latter peak,  
147 estimated in the second constant phase.

148

#### 149 Epidemic data

150 Data on the number of infected people and fatalities were obtained from the Johns Hopkins  
151 University repository (Dong et al. 2020) on 01 September 2021. These values for Japan were from  
152 the government's site (Ministry of Health, Labour and Welfare 2021). In the actual data,  $I$   
153 represented the daily confirmed cases; as they fluctuated, a moving average of 9 days interval was

154 used.  $K$  was calculated from the difference in the moving average over a 7-day period, to avoid  
155 the influence of the day of the week, and represented the moving average of the 9 days interval.  
156 The mortality rate was calculated as the number of deaths after 7 days per number of patients on  
157 a particular day. The moving average of the 9-day interval was used.

158

#### 159 Finding peaks and estimation of $R_0$ and $\tau$

160 The peak of  $K'$  was found in the following way: the peak of  $K'$  occurred when  $dK'/dt$  changed  
161 from positive to negative (Fig. S2A). The maximum  $K'$  during the four days before and after this  
162 change was recorded as the peak day and peak height. In practice,  $dK'/dt$  fluctuates; therefore, we  
163 used a 9-day moving average to calculate it. The intervals of the peaks were estimated using peak  
164 dates. The negative peak of  $K$  was also detected in the same way using  $K'$ , and the peak heights  
165 were used to estimate  $\tau$ . As shown in Fig. 4B, the regression was effective at -0.04; however, only  
166 values less than -0.08 were used to avoid the noise of interference for safety. By using the  $K'$   
167 peaks and  $\tau$ , a series of  $R_0$  values in a country was also estimated using the equation presented in  
168 the legend of Fig. 3.

169

170 The changes in  $I$  of a country were approximated by the SIR model using the least number of  
171 peaks. The number of confirmed cases in South Africa had three obvious peaks; in addition to  
172 these three, two concealed peaks were temporarily placed in between. The  $S_0$  of each peak was  
173 estimated from the fragments of data that were roughly dissected vertically. For the three obvious  
174 peaks,  $R_0$  and  $\tau$  were estimated from the peaks of  $K'$  and negative peaks of  $K$  (Fig. 4F); for those  
175 of the two minor peaks, which were a combination of the smaller peaks, the average values were  
176 used. The increase and decrease in each of the peaks were estimated using the SIR model and  
177 summed. As  $I$  of the real data presents the number of confirmed cases in the day, the simulation  
178 data for  $I$  will become larger for  $\tau$  because this is the total number of days for  $\tau$ . Hence, the number  
179  $dS/dt$  is used instead.

180

#### 181 Quantile-quantile (QQ) plot

182 The quantile-quantile (QQ) plot compares the quantiles of data with those of a particular  
183 distribution; this was done to find a suitable model for the data (Tukey 1977). The peak heights,  
184 peak intervals,  $R_0$ , and mortality rates were determined. For the theoretical values, the exponential  
185 distribution, which is frequently used to describe intervals of randomly occurring events and the  
186 normal distribution (Stuart & Ord 2010), was tested. By comparing the quantiles of the real data  
187 and the theoretical value, a linear relationship was obtained if the data followed the distribution  
188 model. It should be noted that because the mode of the exponential distribution is in the lowest  
189 class, the plot at the upper classes becomes thin (Fig. S3A).

190

191 There is a limit to the resolution of the short intervals of peaks; two peaks that are too close are  
192 counted as one. Therefore, the short intervals were neglected. This is problematic because the  
193 mode of the exponential distribution has the smallest values; in fact, it is named because the  
194 probability density function decreases exponentially. When there are such missing intervals, the  
195 regression line of the QQ plot does not pass through the origin, although the smallest interval  
196 should be zero. The distribution of the data was evaluated by compensating for this missing data  
197 by adding a set of arbitrary negative values to the data so that the line passed through the origin.  
198 The added values do not appear in the plot; therefore, the missing data will create a space in the  
199 smallest area. As a property of exponential distribution, such compensation does not change the  
200 shape of the distribution on the QQ plot, but only shifts it horizontally in parallel. Therefore, the  
201 slope, which represents the mean, was maintained.

202

## 203 **Results**

204 In a simulation of a single epidemic observed alone,  $K$  inherently showed biphasic constant values  
205 (Fig. 1, black). In this case,  $K$  became constant at 0.4, when  $S/P \approx 1$ , and at -0.2, when  $S/P \approx 0$ .  
206 As a result,  $I$  increased and decreased exponentially; therefore, the changes became linear when  
207 considered in logarithmic form (Fig. 1B). The dotted lines in Panel B show an exponential  
208 increase and decrease with the estimated constant rates, respectively.

209

210 However, in a real-world scenario,  $K$  increases and decreases linearly, never becoming constant  
211 (Konishi 2021a). In the simulation, such a linear upward and downward trend was observed when  
212 the peaks had overlapping tails. Fig. 2A shows the cases where the infection from a new strain  
213 started after 40, 90, 150, 220, and 290 days from the first one. Each  $S_0$  was  $1E5$ , but only the last  
214 peak was given 10 times the number of people. The constant phase disappeared because the  
215 previous peaks masked the increase in the earlier days of  $I$ , when  $I$  was still small; the original  $K$   
216 of the infections that started late are shown by the dotted lines (Fig. 2A).

217

218 The movement of  $K$  precedes the movement of  $I$  by several weeks (Fig. 2). The exponential  
219 increase begins before  $K$  turns upward, but this turning occurs several weeks before  $I$  begins to  
220 rise visibly. Similarly, we have to wait several weeks after  $K$  shows a downward trend before  $I$   
221 actually decreases; when  $K$  becomes positive,  $I$  is in the valley bottom between peaks; when  $K$   
222 becomes negative,  $I$  is at the peak top.

223

224 The peak top of  $K$  decreased as the peak came closer to the previous peak. The period when  $K$  is  
225 positive (indicated by the numbers in Fig. 2B) also changes; the closer it is to the previous peak,



226 the shorter it becomes. It should be noted that the total number of  $I$  became ten times higher just  
227 by increasing this period from 28 to 36 days.

228

229 Compared to the sensitive change in the peak tops because of the overlapping peaks, the negative  
230 peak did not change significantly (Fig. 2B), which also appeared when the width of the peak was  
231 changed by altering  $R_0$  (Fig. 2C). This may allow the estimation of the mean infectious time from  
232 the negative peaks of  $K$ , as  $1/(-K)$ . Of course, if the peaks are close together (Fig. 2B) or the widths  
233 of the peaks are wide (Fig. 2C), interference will occur, and a negative peak is observed at a higher  
234 position than in the original biphasic state. However, if there is a period when the peak interval is  
235 sufficiently large to create a window of visibility, negative peaks of  $K$  can be observed. The effect  
236 of this interference between peaks was confirmed by simulations with various  $\tau$  over a set of twin  
237 peaks of the same size with a 40-day interval (Fig 2E). As shown below in the real data, an interval  
238 of this magnitude can be expected in a few months (Fig. S3B). Estimations using  $\tau = 1/(-K)$  (Fig  
239 2E, black) are always larger than the actual  $\tau$  (coloured); thus, it is a safe method of estimation.  
240 Therefore, the  $K$  observed at a small level is appropriate for estimating the level of  $\tau$  in the country.  
241 Additionally, a heavy interference is visibly apparent; hence, it can be simply eliminated, although  
242 the simulation was performed until just before the two peaks overlapped and became one.

243

244 The difference in  $R_0$  appears in the slope of  $K$ . Fig. 2C is the result of simulating the epidemic at  
245 the presented  $R_0$ , in which the epidemics started at 20-day intervals. The slopes may stably present  
246  $R_0$  compared to the peak tops (Fig. 2B), and we can use the peak tops of  $K'$  to define the slope  
247 (Fig. 2D). However, since  $R_0 = \beta\tau$ , the value of  $R_0$  depends on  $\tau$  at that time, even if the variants  
248 have similar infectivity. Because  $R_0 = 2^{K\tau}$ ,  $R_0$  may intrinsically change its value exponentially. The  
249 simulation showed that the value  $R_0$  changed exponentially according to the slopes, and the  
250 difference in mean infectious time,  $\tau$ , alters the estimation of  $R_0$  (Fig. 2F).

251

252 The relationship between  $\tau$  and other parameters can be predicted empirically, although this  
253 relationship was not solved analytically. Fig. 3A shows the relationship between the  $K'$  peak and  
254 the logarithm of  $R_0$  for  $\tau = 9.9$ , showing that they have a linear relationship over a wide range.  
255 Linearity was also observed for different values of  $\tau$  (Fig. 2F), but the slope and intercept varied  
256 with  $\tau$ ; they showed a linear relationship defined as  $\tau\sqrt{2}$  (Figs. 3B and 3C). Therefore, when  $\tau$  is  
257 available through the negative peak of  $K$ , we can translate the peak of  $K'$  to  $R_0$  by using only  $\tau$  (the  
258 legend in Fig. 3). The lines in Fig. 2F are not regression lines but are relationships estimated from  
259  $\tau$ , showing agreement with the simulation. The length  $\tau$  also affects the relationship between  $K'$   
260 and  $\beta$  and the expectation of infections per day (Fig. 3D).

261



262 Here, we consider actual data by using the Johns Hopkins University repository (Dong et al. 2020)  
263 which covers data from 279 countries and regions. First, the intervals between peaks followed an  
264 exponential distribution (Fig. 4A), which represented the intervals of randomly occurring events  
265 (Stuart & Ord 2010). As the shorter intervals may have been missed, this distribution compensated  
266 for the missing data (Materials and Methods). The data in the linear range of the QQ plot were  
267 probably generated by a common mechanism. Data outside this range are likely to be affected by  
268 some effects, including noise. The top 1% were above the regression line; these longer periods  
269 were reported in well-controlled countries, where peaks were rare. The slope of the regression  
270 line was 11.3 days; as a characteristic of the exponential distribution, this is the mean and standard  
271 deviation. According to this distribution, the 40-day interval corresponded to the 97th percentile  
272 (Fig. S3A), with a frequency of approximately once every few months (Fig. S3B).

273

274 When the peaks of  $K$  and  $K'$  were observed for all the countries, they were also distributed  
275 according to the exponential distribution (Fig. 4B and S2B). Although the peaks of  $K'$  and the  
276 negative peaks of  $K$  were detected from both sides of the negative and positive peak heights, all  
277 the data were used as is. Incidentally, the  $K$  and  $K'$  peaks appeared to be unrelated to the interval  
278 length (Fig. S4); hence, the distribution was not determined by the intervals. There were  
279 approximately 3600 peaks in  $K'$  and  $K$  between 2020-05-01 and 2021-07-01. Although many  
280 peaks may have been missed (Fig. 4A), the distribution was clearly observed, suggesting that the  
281 missing peaks occur randomly, possibly because of the short intervals, and are not related to the  
282 peak height.

283

284 In the negative peaks of  $K$ , from which the mean infectious time could be estimated as  $\tau = 1/(-K)$   
285 (Fig 2E), the slope was -0.082; hence, the mean of  $\tau$  was 12 days (Fig 4B). The 10th percentile of  
286 the data was -0.2, representing 5 days, which is close to the value reported in the meta-analysis  
287 (Alene et al. 2021). The grey horizontal line represents the upper limit of the linear relationship,  
288 which corresponds to  $K = -0.04$ . Data with larger values may be heavily affected by noise (Fig.  
289 2E).

290

291 The number of consecutive  $K$ -positive days was exponentially distributed (Fig. 4C). It is possible  
292 that shorter intervals were missing; hence, this was compensated for. The average was 6 days, but  
293 the mode observed was 10 days.

294

295 A series of  $R_0$  values in a country was estimated using the peaks of  $K'$  and estimated  $\tau$ . Because  
296  $R_0$  is calculated as  $R_0 = 2^{K\tau}$ , the logarithms of  $R_0$  were compared with the theoretical value of the  
297 exponential distribution, although the relationship bent slightly downward (Fig. 4D). The top 5%

298 of the data had higher values than the regression line. The ratio was larger than the slope upward  
299 of  $K'$  (Fig. S2B); therefore, this may include the effect of the extension of  $\tau$  in some countries, in  
300 addition to that of super-spreaders and the newest infectious variants. In fact,  $\tau$  affects  $R_0$ ; when  $\tau$   
301 is small,  $R_0$  remains low, and when  $R_0$  is large,  $\tau$  is always large (Fig. 4E). The high values of  $\tau$   
302 more than  $1/(-0.04) = 25$  may be affected by noise (Fig. 2E and 4 B); reduction of the noise by  
303 compressing Fig. 4E to the left would show a monotonic increase. When  $K$  could be reduced to -  
304 0.1 and, hence,  $\tau$  was less than 10 days,  $R_0$  could be maintained at a low level (Fig. 4E), which  
305 may be less than the limit level of exponential increase (Fig. 4D and S1A).

306  
307 Many of the smaller data in Fig. 4D may have been heavily affected by noise in measuring the  
308 slopes (Fig. 2F); thus, the plot turned downward. The lower limit of the regression was  
309 approximately  $R_0 = 2$ ; measurements less than this level would be inaccurate because of noise.  
310 Since the missing data probably occurred independent of the magnitude of  $R_0$ , they were not  
311 compensated for. Rather, this distribution should be considered to have a positive minimum value,  
312 the background; here, it was 1.7, that is, the intersection of the regression line. This extrapolated  
313 value could be the least value that could enable an exponential increase, which would result in  
314 detectable peaks of  $K$ . The slope was 0.1; hence, the mean of the basic reproduction number was  
315  $R_0 = 1.7 + 10^{0.1} = 2.9$ . Owing to the nature of the exponential distribution (Fig. S3A), values smaller  
316 than 2 were frequently observed (Fig. 4D). For safety, these values should be recognised as "less  
317 than 2 and larger than 1.7".

318  
319 Using the estimated  $R_0$  and  $\tau$ , the confirmed cases from South Africa were approximated by using  
320 the SIR model using the least number of peaks estimated: three obvious peaks and two in between  
321 them (Fig. 4F). The match is particularly close for the three obvious peaks, indicating that the  
322 estimates of  $R_0$  and  $\tau$  were reasonably accurate. Here, 21 peaks of  $K$  were identified; it would be  
323 possible to approximate the results with more accuracy by using all these peaks; however,  
324 estimations of the location of each peak and the assignment of  $S_0$  would require fine tuning, such  
325 as an approach of repeating simulations to find the optimal solution.

326  
327 Below is a snapshot of the situation in a few countries (Figs. 5–7). The full set of results is shown  
328 in Figshare (Konishi 2021b). In almost all cases,  $K$  always increased or decreased linearly. Note  
329 that the scales of  $K$  and  $K'$ , presented on the left-hand axis, are common among all the figures, but  
330 the number of confirmed cases on the right-hand axis varies significantly.

331  
332 When the variant is replaced by a new one, the previous measures lose their effectiveness, people  
333 with certain lifestyles become the new targets as  $S_0$ , and a new epidemic starts. This phenomenon

334 is evident in Figs. 5 and 6. The Philippines is an example that has two opposite aspects: success  
335 and failure of controlling epidemics (Fig. 5A). Until April 2020,  $I$  remained low because there  
336 was no  $K$ -positive continuum. However, in May, when the variant changed, the  $K$  positives  
337 became consecutive, and a large peak was reached. Thereafter, while the series of  $K$ -positives was  
338 halted, the negative days could not be controlled and  $I$  continued to remain high, creating a large  
339 peak when a new variant came in January 2021. New variants produced peaks in South Africa  
340 and Tokyo (Fig. 5B and 5C) (Konishi 2021a; Konishi 2021c). As  $I$  did not drop completely, a few  
341  $K$ -positive days in a row led to an explosion of the infection. Several countries showed this trend,  
342 and Mexico was an extreme example (Fig. 5D).

343

344 Although the Olympics were held in Tokyo, the mean infectious time in this city, in June 2021,  
345 was 16 days. This shows that the measures are not working well and that the delta variant (WHO  
346 2021) is spreading (Fig. 5C). Since the opening of the Olympic Games (green vertical line), there  
347 has been an explosion of infections in this city, with an  $R_0$  of 15. This is one of the worst data in  
348 the world to date (Fig. 4D).

349

350 Other disastrous examples of repetitive  $K$ -positives were the US and India (Fig 6 AB).  $K$  increases  
351 not only when variants are new, but also when there is something new about the way people live.  
352 There were large elections in these countries. Politicians did not ask people to self-restrain; instead,  
353 they mobilised defenceless people for election rallies (Menon & Goodman 2021; Norris &  
354 Gonzalez 2020). There was also a major religious event in India (Pandey, 2021). These countries  
355 allowed  $K$ -positive days to last for unusually long periods, producing the world's first and second  
356 largest cumulative number of cases. It should also be noted that in both countries, all the series of  
357  $R_0$  detected were less than 2.

358

359 Another characteristic of these countries is that their mean infectious time was long. For example,  
360 in the US and India, the  $K$  negative peaks were greater than -0.05 (Fig 6 AB, orange); therefore,  
361 the mean infectious times were probably longer than 3 weeks. The other heavily infected countries  
362 seem to be the same (Fig. 5 and 6).

363

364 Vaccines have limited effectiveness in controlling epidemics, aside from reducing mortality. This  
365 is evident in the UK, Israel, and the US (Fig. 6ACD), where vaccination is well underway. As  $K$   
366 continues to rise, it is inevitable that new epidemics will appear in these countries. In fact, in all  
367 those countries, the number of confirmed cases decreased for a while but soon returned to the  
368 original level.

369

370 One of the characteristics of a country that has controlled the epidemic well is that it is able to  
371 suppress the  $K$  positives immediately (Fig. 7). Hence, the values of  $K$  frequently increase and  
372 decrease. In these countries,  $I$  can even be zero, resulting in the interruption of the line because  $K$   
373 cannot be calculated. Additionally, in these countries, the negative peaks of  $K$  are as low as  $-0.2$ ;  
374 therefore, the mean infectious time would have been 5 days or even shorter, suggesting quick  
375 discovery and isolation of infected people. For example, in Iceland (Fig. 7A), even if there are  
376 some  $K$ -positive days, they are quickly suppressed and do not cause epidemics. This trend has  
377 been observed in New Zealand (Fig. 7B), Australia, and China (Konishi 2021b). It takes constant  
378 effort to maintain this, and these countries continue to do so. Taiwan (Fig. 7C) experienced an  
379 outbreak of the highly contagious alpha variant (World Health Organisation 2021) in June 2021,  
380 with an  $R_0$  of 4. However, a rapid response quickly reduced  $K$  and maintained the number of  
381 infected people under control. Tottori is a Japanese prefecture (Fig. 7D), which had one outbreak  
382 of COVID-19 infections at the time of the Olympics, with  $R_0 = 3.7$  at the peak; however,  $K$   
383 converged in a few days. The mean infectious time was particularly short (2 days), one of the  
384 shortest in the world (Fig. 4B). There seems to be a huge disparity between municipalities, even  
385 in the same country, as observed in Tokyo (Table S2). Naturally, there are fewer  $K$ -positive days  
386 in these countries and areas. A correlation was observed between the number of  $K$ -positive days  
387 and confirmed cases in the country (Fig. 7E). This is probably because these countries are able to  
388 maintain a low  $\tau$ . In fact, there was a positive correlation between  $\tau$  and the number of confirmed  
389 cases (Fig. 7F).

390  
391 In addition to  $K$ , mortality rate was assessed. The rate was roughly log-normally distributed (Fig.  
392 8A). The global average was 0.017, but it is worth noting that it had an exponential spread. This  
393 value varies considerably from country to country, and mortality tends to be higher in countries  
394 where  $K$  does not decline (Fig. 8B and Fig. 5D). This may be due to a lack of medical care. Even  
395 in countries where vaccines are widely available, the mortality rate does not necessarily decrease  
396 as much (Fig. 8C). The rate increases or decreases with time, with the peak in mortality occurring  
397 a few months later than the peak in  $I$  (Fig. 8D and 8E). The number of deaths and mortality rates  
398 were lower in countries where the epidemics were well controlled, probably because they have  
399 more affluent medical resources (Fig. 8F and Table S2).

400

## 401 Discussion

402 The results of the simulation, in which the infections were repeated at short intervals, showed a  
403 linear increase and decrease in  $K$  (Fig. 2), similar to the real data (Figs. 5–7). By observing  
404 changes in  $K$ , the important parameters  $R_0$  and  $\tau$  could be estimated (Figs. 3 and 4), and by using  
405 these parameters, the SIR model could approximate changes in the confirmed cases (Fig. 4F).

406 These results confirm the appropriateness of this well-established model for COVID-19  
407 epidemics. The real data suggested that the epidemics with small  $S_0$  started in a time-shifted  
408 manner with a mean interval of 11.3 days (Fig. S3). The  $S_0$  of each epidemic might be determined  
409 by the infectivity of the variant, lifestyle, and government measures.

410  
411 By observing  $K$ , patterns of distributions of peak intervals, negative peaks of  $K$ , the slope of  $K$ ,  
412 and  $R_0$  were revealed from the real data using the SIR model (Fig. 4). They were distributed  
413 according to the exponential distribution; this study was possible because  $K$  can be estimated  
414 simply and automatically (Table S1). Knowledge of the statistical distribution is advantageous  
415 not only for the accuracy of data analysis, but also because it provides information regarding the  
416 magnitude of the data as well as the hidden mechanism that causes the distribution (Tukey 1977).  
417 In addition, the distribution was used to determine the confidence limits of the measurements (Fig.  
418 4).

419  
420 The reason why the peak heights of  $K$  and  $K'$  obey the exponential distribution (Fig. 4B and S2B)  
421 may be complicated. The distribution is often used to represent intervals of randomly occurring  
422 events; therefore, it appeared in the cases of the peak intervals and length of consecutive  $K$ -  
423 positive days (Fig. 4A and 4C). However, this distribution may also occur if variable factors  
424 increase over time, and the peak height is determined by the size of the factors when the peak  
425 occurs in a random manner (here, the timing of occurrence is unrelated to the size). A negative  $K$   
426 peak was determined by how quickly a patient could be identified and isolated. Therefore, the  
427 accumulation of countermeasures may act as an increasing factor. Peaks of  $K'$  correlate with the  
428 infectivity of a virus. Infectivity is determined by sequence differences; therefore, accumulated  
429 mutations may act as an increasing factor. Additionally, as  $R_0 = 2^{K\tau}$ , the logarithm of  $R_0$  would  
430 have a pseudo-exponential character (Fig. 4D). Much of the upwardly displaced data (Fig. 4D)  
431 would have been affected by the extended  $\tau$  (Fig. 4E) rather than simply the increased infectivity  
432 (Fig. S2B). Presumably, in cases where  $R_0$  was large, medical care was more likely to be poor,  
433 and patients could not be detected and isolated in time.

434  
435 We could estimate important parameters of the SIR model, such as  $R_0$  and  $\tau$ , by observing the  
436 increase and decrease in  $K$  (Fig. 4). This is easier than repeating simulations to find the optimal  
437 solution and is more objective than calculating them using artificial intelligence (Rahimi et al.  
438 2021). These approaches would estimate the parameters with higher accuracy, but this does not  
439 guarantee higher certainty. Rather, using a physical parameter, such as  $K$ , allows easier access to  
440 information (Table S1) and is useful for understanding and predicting epidemics, which would be  
441 beneficial for decision-making authorities.

442

443 The statistical distribution of  $\tau$  necessitated revisions of both the isolation period and the decision  
444 to release a patient. In Japan, the isolation period is uniformly 10 days (Tokyo Metropolitan  
445 Government 2021), and no PCR test is performed when the isolation is lifted. However, the mean  
446 infectious time in Tokyo was 16 days (Fig. 5C). Furthermore, this estimated  $\tau$  would have been  
447 shortened by the effort to find and isolate the patients; the period in which a patient excretes the  
448 virus must be longer than  $\tau$ . Therefore, the isolation period must be longer. Furthermore, according  
449 to the SIR model, the average value represents half-life. This indicates that many patients may  
450 have been infectious upon release. Thus, the required period for isolation varies from person to  
451 person, and this cannot be determined without testing.

452

453 Observing the daily changes in  $K$  is important for evaluating and forecasting the state of epidemics  
454 (Figs. 7E and 7F). If  $R_0$  is low, many susceptible individuals will escape the infection (Fig. S1),  
455 but as the original  $S_0$  is unknown, information on  $R_0$  is not useful for predicting the scale of  
456 infection. If appropriate measures are taken, the epidemic converges rapidly, and vice versa,  
457 regardless of  $R_0$ . Unfortunately, the magnitude of  $S_0$  did not alter the slope of  $K$  (Fig. 2B). In fact,  
458 while  $K$  and  $K'$  were presented on the same scale among countries, the confirmed cases differed  
459 significantly (Fig. 5-7). Therefore, a single measurement of  $K$  was not useful for the evaluation.  
460 Rather, the scale of the epidemic can only be estimated from the continuous observation of the  
461 increase and decrease in  $K$  (Figs 5-7).

462

463 The mean value of  $R_0$  was 2.9, suggesting that in this situation, approximately 20% of the  $S_0$   
464 would be spared from infection, and a lower  $R_0$  should be more frequent (Figs. 4D and S3A),  
465 leaving more uninfected people (Fig. S1). However, ending the pandemic by herd immunity may  
466 not be achieved. If patients are left in a city, new variants that break the previous immunity start  
467 the next epidemic. Due to the large number of infected people, this virus is now mutating at a  
468 faster rate than the N1H1 influenza virus (Konishi 2021c). Termination of the pandemic is not  
469 expected, given that the flu has not yet been terminated by herd immunity. Additionally, even  
470 small differences may find a new set of  $S_0$ . In fact, approximately two-thirds of adults in India  
471 and Brazil are reported to have antibodies against the coronavirus (Deutsche Welle 2021), but the  
472 outbreak has not ended at all in these countries (Fig. 5, Konishi 2021b).

473

474 If  $K$  is consecutively positive for more than, for example, 10 days (Fig. 4C), the number of patients  
475 will clearly increase; if the number of  $I$  is already high, it is almost inevitable that there will be a  
476 peak a few weeks to a month from that time. The longer  $K$  is positive, the more the number of  $I$   
477 increases exponentially, resulting in more cases (Fig. 7E). For example, in the case shown in Fig.



478 2B,  $I$  increased tenfold after  $K$  remained positive for only eight more days. Therefore, it is  
479 important to not allow a series of  $K$ -positives to occur. Therefore, policy measures must be  
480 implemented to reduce  $K$  at an early stage. The large epidemics in the US and India were not  
481 caused by high  $R_0$ ; they occurred because  $K$  was allowed to remain positive (Fig. 6). The large  
482 peaks were not caused by the speed of the infection, but because of the longer period of lack of  
483 infection control. In Tokyo, this number reached 70 days before and after the Olympics (Table  
484 S1). This is one of the worst records in the world (Fig. 4C).

485

486 The more rapid the detection and isolation of a patient, the shorter the mean infectious time  $\tau$ .  
487 This can be attributed to the negative  $K$  peak (Fig. 2E). This value is probably 2 weeks or more if  
488 the patients are left untreated (Fig. 5 and 6). Figs. 4E and 7F show that  $\tau$  should be maintained at  
489 a low value. The differences in  $\tau$  depend on the measures taken by the government: more PCR  
490 testing, isolation of infected people, and proper lockdown and testing of all people in the area  
491 when  $K$  is increased. Only regions that have been able to follow this protocol can successfully  
492 control epidemics and maintain their status (Fig. 7). Many other countries are unable to maintain  
493 a negative  $K$  value, and thus the levels of  $I$  remain high (Fig. 5 and 6). This hides the initiation of  
494 new epidemics and provides a chance for new mutations to occur (Konishi 2021a).

495

496 The benefits of reducing  $\tau$  are also evident in the comparison between Tokyo (Fig. 5C) and Tottori  
497 (Fig. 7D). Here, although the cities are different in size, infections per population and death rate  
498 differed by an order of magnitude, with the rates in Tokyo close to those in the US and UK, and  
499 the rates in Tottori were close to those in countries with infections under control. In particular,  
500 there was a double-digit difference in deaths per population between the two cities (Table S2). In  
501 August 2021, the positivity rate of PCR tests in Tokyo remained above 20%. This is because the  
502 number of tests was too small; in contrast, individuals participating in the Olympics were taking  
503 the tests daily (Tokyo Metropolitan Government 2021). On 4 August 2021 the government asked  
504 the medical institutions to keep all the patients who were not in critical condition at home, and  
505 Tokyo decided to embrace this policy (NHK 2021). In fact, a bed could not be found for an  
506 emergency patient in 100 hospitals in Tokyo (TBS 2021). Of the positive patients who requested  
507 ambulance transport between 2 and 8 August, 2021, 57% were sent back home as there was no  
508 hospital with the capacity to accept them. However, 7,000 medical personnel were mobilised for  
509 the Olympics (Yomiuri 2021). Such an irresponsible policy means the abandonment of disease  
510 control, including finding and isolating patients; therefore,  $\tau$  in this region will rise further,  
511 consequently expanding  $R_0$  (Fig. 4E) and the number of cases (Fig. 7F). This huge difference is  
512 due to the policy of the local governments on what to treat as important.

513



514 Unfortunately, vaccines seem to have limited effectiveness as a means of ending the epidemic  
515 (Fig. 5). This is probably related to the fact that they are not given to younger children, and some  
516 people do not wish to be vaccinated. Furthermore, newer infective variants may break through  
517 acquired immunity. The simplest way to end the pandemic is to eliminate the virus, as in the cases  
518 of SARS and smallpox. Some of the countries with reduced  $\tau$  have almost succeeded in doing this,  
519 but the newer variant that comes from the rest of the world is abolishing this attempt. COVID-19  
520 elimination can only be accomplished through worldwide efforts. If the current situation cannot  
521 be improved, the epidemic will continue in countries where it is already prevalent.

522

### 523 **Conclusion**

524 Simulations showed that the SIR model was effective for the COVID-19 epidemic. Accordingly,  
525 by continuously observing the logarithmic growth rate,  $K$ , we can predict the number of patients  
526 for the following few weeks up to a month. To control the epidemic, it is critically important to  
527 prevent  $K$  from remaining positive consecutively; rather, efforts must be undertaken to reduce  $K$   
528 to end the peaks completely. It is essential to identify and isolate infected individuals to reduce  
529 the mean infectious time, which appears in the negative peaks of  $K$ . The mean infectious time was  
530 12 days on average, but it could become more than twice if the patients were left untreated. Since  
531 this represents the half-life, the criteria for isolation, such as those adopted in Japan, need to be  
532 more restrictive.

533

### 534 **References**

- 535 Alene M, Yismaw L, Assemie MA, Ketema DB, Gietaneh W, and Birhan TY. 2021. Serial interval  
536 and incubation period of COVID-19: A systematic review and meta-analysis. *BMC*  
537 *Infectious Diseases* 21:257. [10.1186/s12879-021-05950-x](https://doi.org/10.1186/s12879-021-05950-x)
- 538 Deutsche Welle. 2021. India: How reliable are herd immunity claims?  
539 <https://www.dw.com/en/india-covid-sero-surveys/a-58648454>
- 540 Dong E, Du H, and Gardner L. 2020. An interactive web-based dashboard to track COVID-19 in  
541 real time. *The Lancet Infectious Diseases* 20:533-534. [https://doi.org/10.1016/S1473-](https://doi.org/10.1016/S1473-3099(20)30120-1)  
542 [3099\(20\)30120-1](https://doi.org/10.1016/S1473-3099(20)30120-1)
- 543 Ellis G, and Silk J. 2014. Scientific method: Defend the integrity of physics. *Nature* 516:321-323.  
544 [10.1038/516321a](https://doi.org/10.1038/516321a)
- 545 Guan WJ, Ni ZY, Hu Y, Liang WH, Ou CQ, He JX, Liu L, Shan H, Lei CL, Hui DSC, Du B, Li  
546 LJ, Zeng G, Yuen KY, Chen RC, Tang CL, Wang T, Chen PY, Xiang J, Li SY, Wang JL,  
547 Liang ZJ, Peng YX, Wei L, Liu Y, Hu YH, Peng P, Wang JM, Liu JY, Chen Z, Li G, Zheng  
548 ZJ, Qiu SQ, Luo J, Ye CJ, Zhu SY, Zhong NS, and China Medical Treatment Expert  
549 Group for COVID-19. 2020. Clinical characteristics of coronavirus disease 2019 in China.

- 550 *New England Journal of Medicine* 382:1708-1720. [10.1056/NEJMoa2002032](https://doi.org/10.1056/NEJMoa2002032)
- 551 Heng K, and Althaus CL. 2020. The approximately universal shapes of epidemic curves in the  
552 Susceptible-Exposed-Infectious-Recovered (SEIR) model. *Scientific Reports* 10:19365.  
553 [10.1038/s41598-020-76563-8](https://doi.org/10.1038/s41598-020-76563-8)
- 554 IUPAC. 2021. lifetime,  $\tau$ . in Gold book. International Union of Pure and Applied Chemistry, ed.  
555 Available at <https://goldbook.iupac.org/terms/view/L03515>
- 556 Konishi T. 2021a. Effect of control measures on the pattern of COVID-19 Epidemics in Japan.  
557 *PeerJ* <https://peerj.com/manuscripts/58872/>
- 558 Konishi T. 2021b. Epidemic of COVID-19 monitored through the logarithmic growth rate.  
559 Dataset. <https://doi.org/10.6084/m9.figshare.16551441.v1>
- 560 Konishi T. 2021c. Progressing adaptation of SARS-CoV-2 to humans. bioRxiv: The preprint  
561 server for biology:2020.2012.2018.413344. [10.1101/2020.12.18.413344](https://doi.org/10.1101/2020.12.18.413344)
- 562 Lauer SA, Grantz KH, Bi Q, Jones FK, Zheng Q, Meredith HR, Azman AS, Reich NG, and Lessler  
563 J. 2020. The incubation period of coronavirus Disease 2019 (COVID-19) from publicly  
564 reported confirmed cases: Estimation and application. *Annals of Internal Medicine*  
565 172:577-582. [10.7326/M20-0504](https://doi.org/10.7326/M20-0504)
- 566 Li Q, Guan X, Wu P, Wang X, Zhou L, Tong Y, Ren R, Leung KSM, Lau EHY, Wong JY, Xing  
567 X, Xiang N, Wu Y, Li C, Chen Q, Li D, Liu T, Zhao J, Liu M, Tu W, Chen C, Jin L, Yang  
568 R, Wang Q, Zhou S, Wang R, Liu H, Luo Y, Liu Y, Shao G, Li H, Tao Z, Yang Y, Deng Z,  
569 Liu B, Ma Z, Zhang Y, Shi G, Lam TTY, Wu JT, Gao GF, Cowling BJ, Yang B, Leung  
570 GM, and Feng Z. 2020. Early transmission dynamics in Wuhan, China, of novel  
571 coronavirus–infected pneumonia. *New England Journal of Medicine* 382:1199-1207.  
572 [10.1056/NEJMoa2001316](https://doi.org/10.1056/NEJMoa2001316)
- 573 Menon S, and Goodman J. 2021. India Covid crisis: Did election rallies help spread virus?  
574 Available at <https://www.bbc.com/news/56858980>. BBC.
- 575 Ministry of Health Labour and Welfare. 2021. Open data. Available at  
576 <https://www.mhlw.go.jp/stf/covid-19/open-data.html>
- 577 NHK. 2021. Tokyo metropolitan government considers reviewing hospitalization standards in  
578 response to government policy of “home treatment”. Available at  
579 <https://www3.nhk.or.jp/news/html/20210804/k10013180591000.html>
- 580 Norris K, and Gonzalez C. 2020. COVID-19, health disparities and the US election.  
581 *EClinicalmedicine* 28:100617. <https://doi.org/10.1016/j.eclinm.2020.100617>
- 582 Our world in data. 2021. Coronavirus (COVID-19) vaccinations. Available at  
583 <https://ourworldindata.org/covid-vaccinations>
- 584 Pandey G. 2021. India Covid: Kumbh Mela pilgrims turn into super-spreaders. Available at  
585 <https://www.bbc.com/news/world-asia-india-57005563>. BBC.

586 R Core Team. 2020. *R: A language and environment for statistical computing*. Available at  
587 <https://www.R-project.org/>. Vienna, Austria: R Foundation for Statistical Computing  
588 Rahimi I, Chen F, and Gandomi AH. 2021. A review on COVID-19 forecasting models. *Neural*  
589 *Computing & Applications*: 1-11. [10.1007/s00521-020-05626-8](https://doi.org/10.1007/s00521-020-05626-8)  
590 Soetaert K, Petzoldt T, and Setzer RW. 2010. Solving Differential Equations in R: Package  
591 deSolve. *Journal of Statistical Software* 33:25. [10.18637/jss.v033.i09](https://doi.org/10.18637/jss.v033.i09)  
592 Stuart A, and Ord JK. 2010. Kendall's advanced theory of statistics, Volume 1. Distribution theory,  
593 6th edition. Wiley  
594 TBS. 2021. About. Available at [https://news.tbs.co.jp/newseye/tbs\\_newseye4327990.htm](https://news.tbs.co.jp/newseye/tbs_newseye4327990.htm), Volume  
595 100 hospitals in Tokyo refused to transport Corona emergency patients for 8 hours  
596 Tokyo Metropolitan Government. 2021. Information about the new coronavirus infection  
597 (COVID-19). Available at <https://www.metro.tokyo.lg.jp/tosei/tosei/news/2019-ncov.html>  
598 Tukey JW. 1977. Exploratory data analysis. London. Reading, Mass.: Addison-Wesley Pub. Co  
599 WHO. 2021. Tracking SARS-CoV-2 variants. Available at  
600 <https://www.who.int/en/activities/tracking-SARS-CoV-2-variants/>  
601 Yomiuri Shinbun. 2021. More than half of Tokyo's ambulance calls fail to reach patients in 959  
602 cases. not enough hospital beds. Available at  
603 <https://www.yomiuri.co.jp/national/20210819-OYTIT50245/>  
604  
605

606

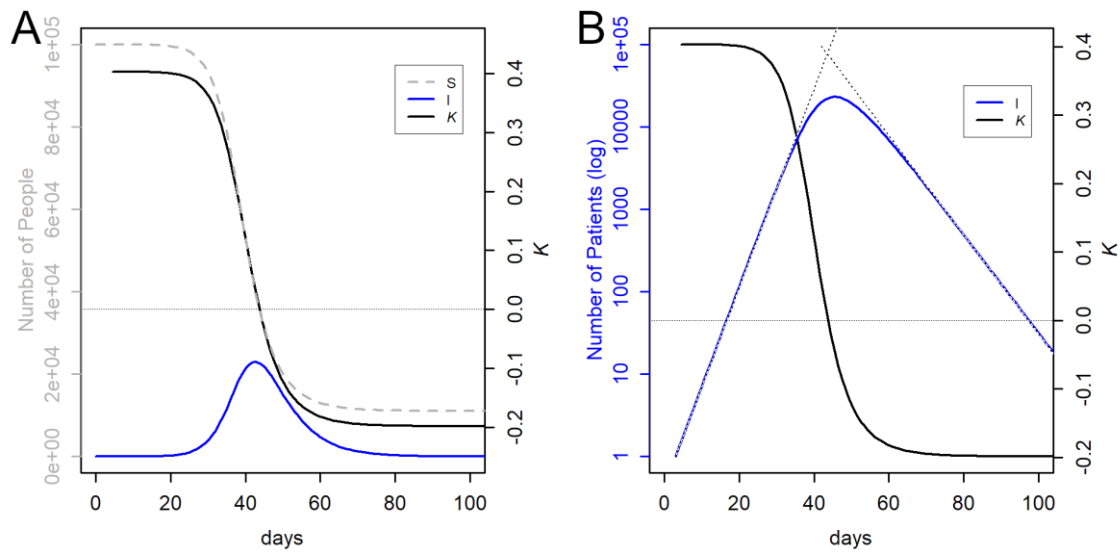

607

608 Fig. 1 Data simulation using the SIR model. The initial parameters are  $S_0 = 1E5$ ,  $I_0 = 1$ ,  $R_0 = 4$ ,  
609 and  $\tau = 5$ . (A) Changes in the number of people. (B)  $I$  in the logarithmic scale. The thin dotted  
610 lines are the exponential increase  $y = R_0^{t/\tau}$  and decrease  $y = S_0 \times 2^{-(t+41)/\tau}$  at  $t$ th day,  
611 respectively. The former means every  $\tau$  day, the number will become  $R_0$  times, and the latter  
612 means every  $\tau$  day the number becomes half.

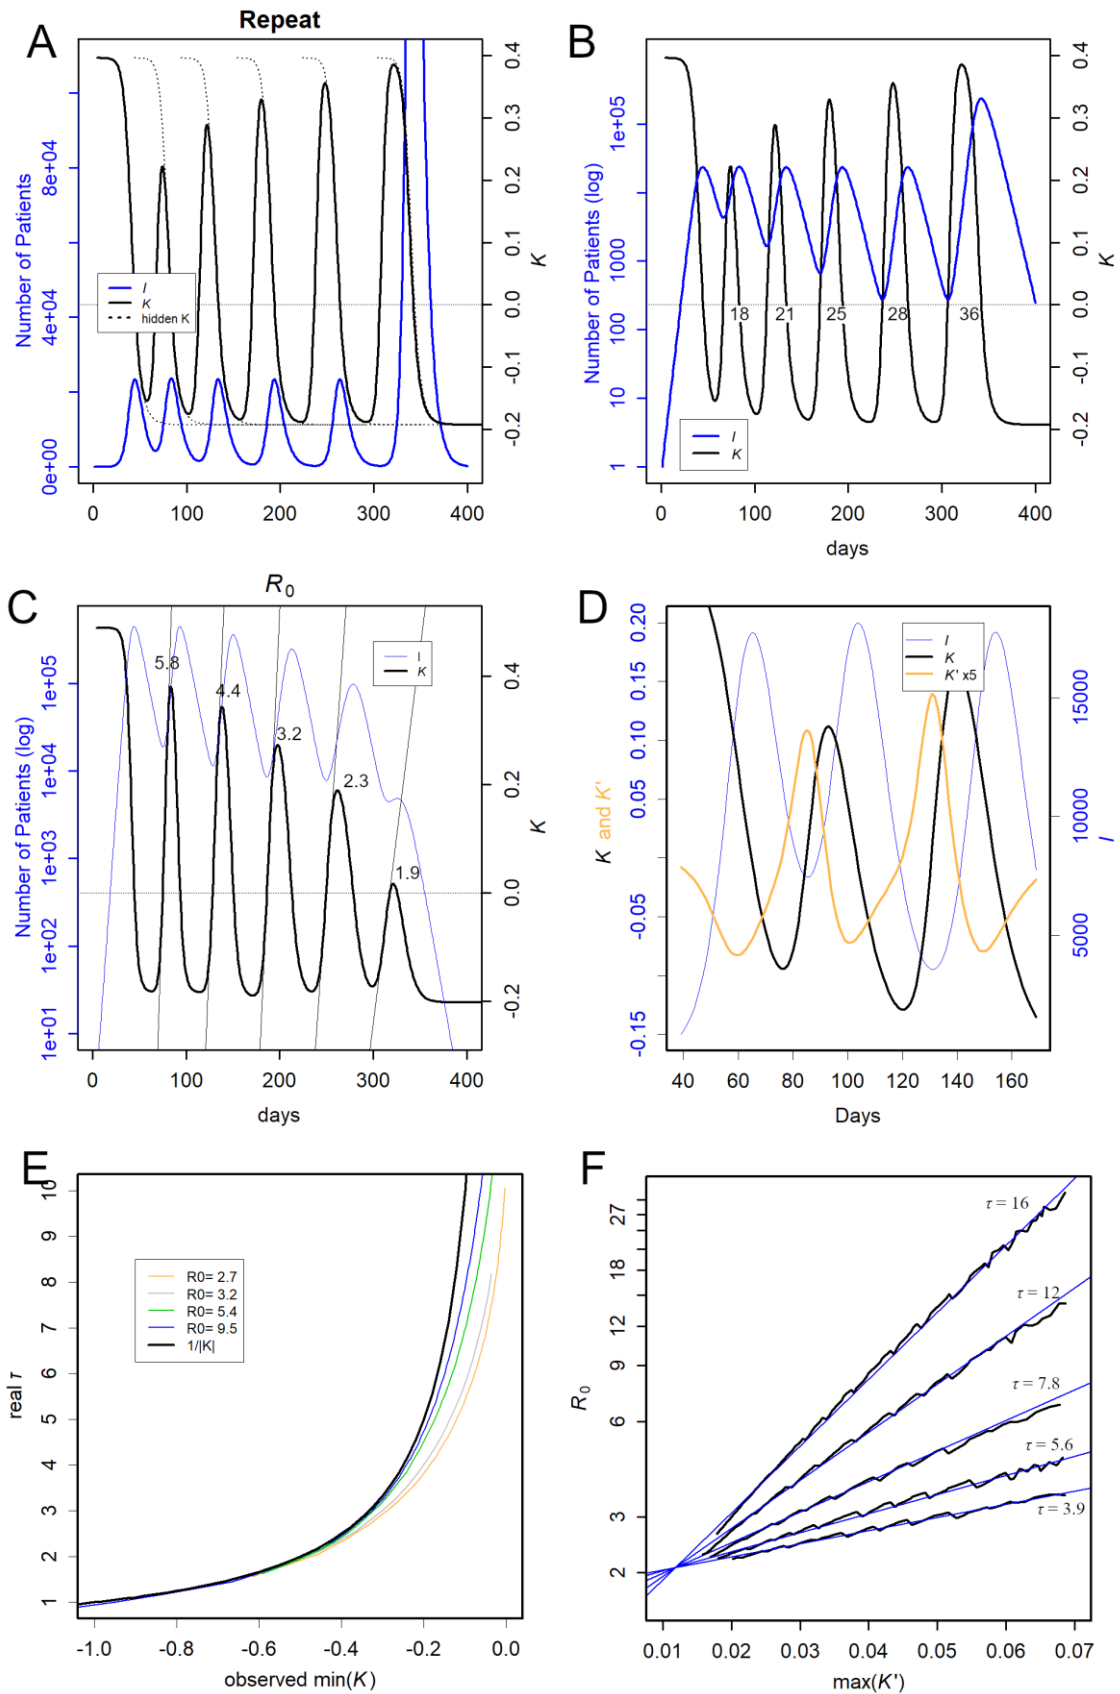

614

615 Fig.2 Simulation of repeated epidemics. **(A)** New epidemics started after 40, 90, 150, 220, and  
616 290 days from the first one. Each epidemic started from  $I_0 = 1$  and  $S_0 = 1E5$ , but  $S_0 = 1E6$  was  
617 observed only for the last time. **(B)** Semi-log display of  $I$ . The numbers indicate the days when  $K$   
618 was positive. **(C)** Infection was initiated every 40 days at the indicated  $R_0$ . The thin solid line  
619 indicates the slope of  $K$ . **(D)** Comparison of  $K$  and  $K'$ . The peak of  $K'$  is near the middle of the  
620 upward slope of  $K$ . **(E)** Relationship between the observed negative peak of  $K$  and the mean  
621 infectious time,  $\tau$ , of the used data.  $1/|K|$  (black), which is used for the estimation of  $\tau$ , is always  
622 larger than that in reality (coloured). **(F)** Relationship between the peak of  $K'$  and  $R_0$  estimated  
623 by simulations at the  $\tau$  presented. A semi-log plot. Blue straight lines present the estimated  
624 relationship deduced from  $\tau$  (Fig. 3); these are not the regression lines.

625

626

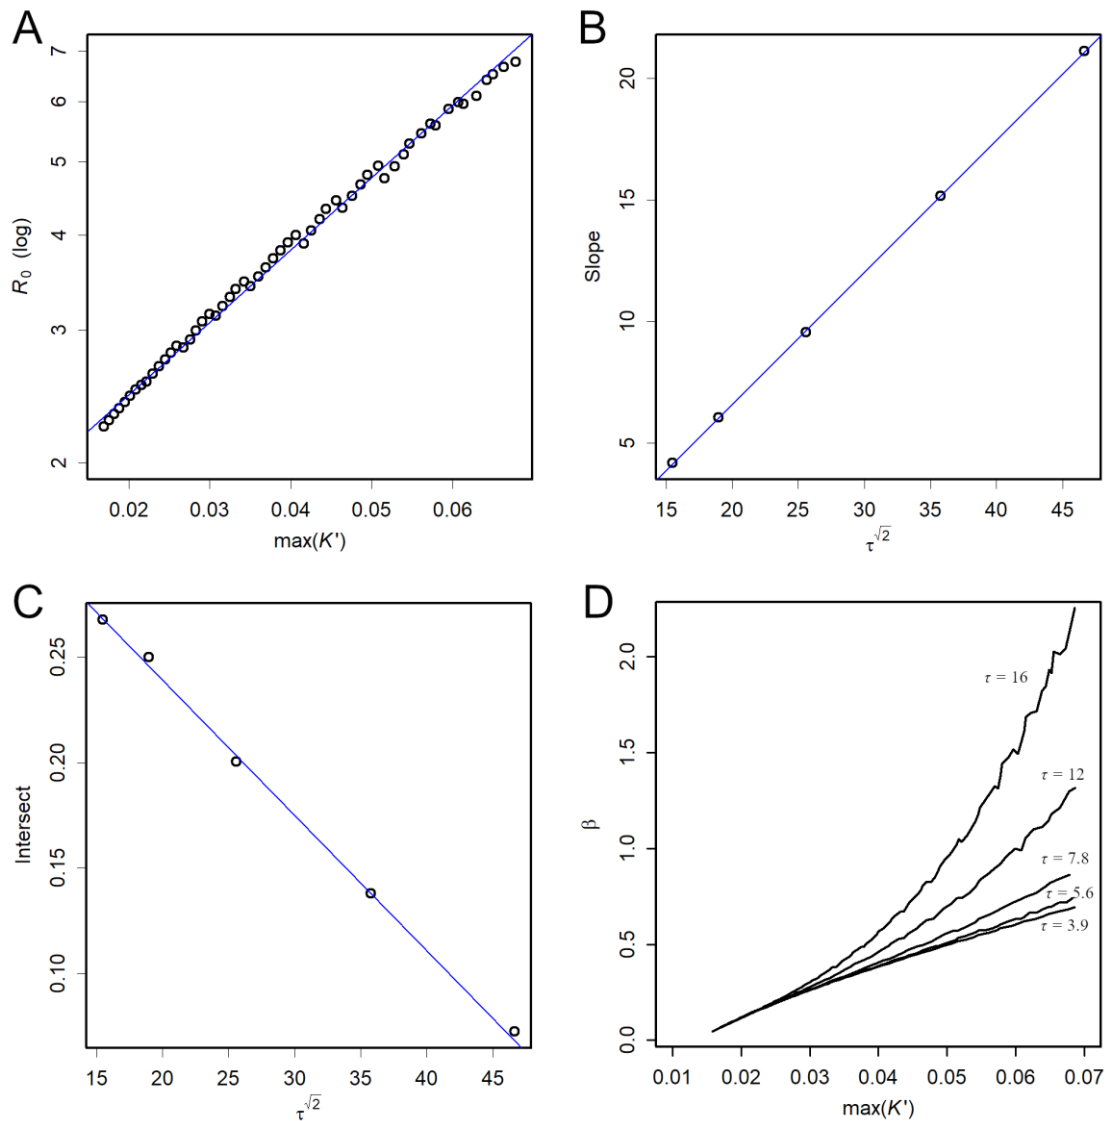

627

628 Fig. 3 Relationships between the mean infectious time  $\tau$  and other parameters. (A) Simulated  
 629 relationship between the peaks of  $K'$  and  $R_0$ . Here, the regression line was robustly estimated by  
 630 the line function of R (Tukey 1977). (B) Relationship between  $\tau$  and the slope of the regression  
 631 line in (A). The slope is  $a = \tau^{(2^{0.5})} * 0.5436 - 4.2803$ . (C) Relationship between  $\tau$  and the  
 632 intercept of the regression line in (A). The intercept is  $b = \tau^{(2^{0.5})} * (-0.006406) + 0.367251$ .  
 633 These values were used in estimating the relationships in Fig. 2F. (D) Simulated relationship  
 634 between  $K'$  peak and  $\beta$ . When  $\tau$  is small the relationship is almost linear, while this would likely  
 635 become exponential when  $\tau$  is larger.

636

637



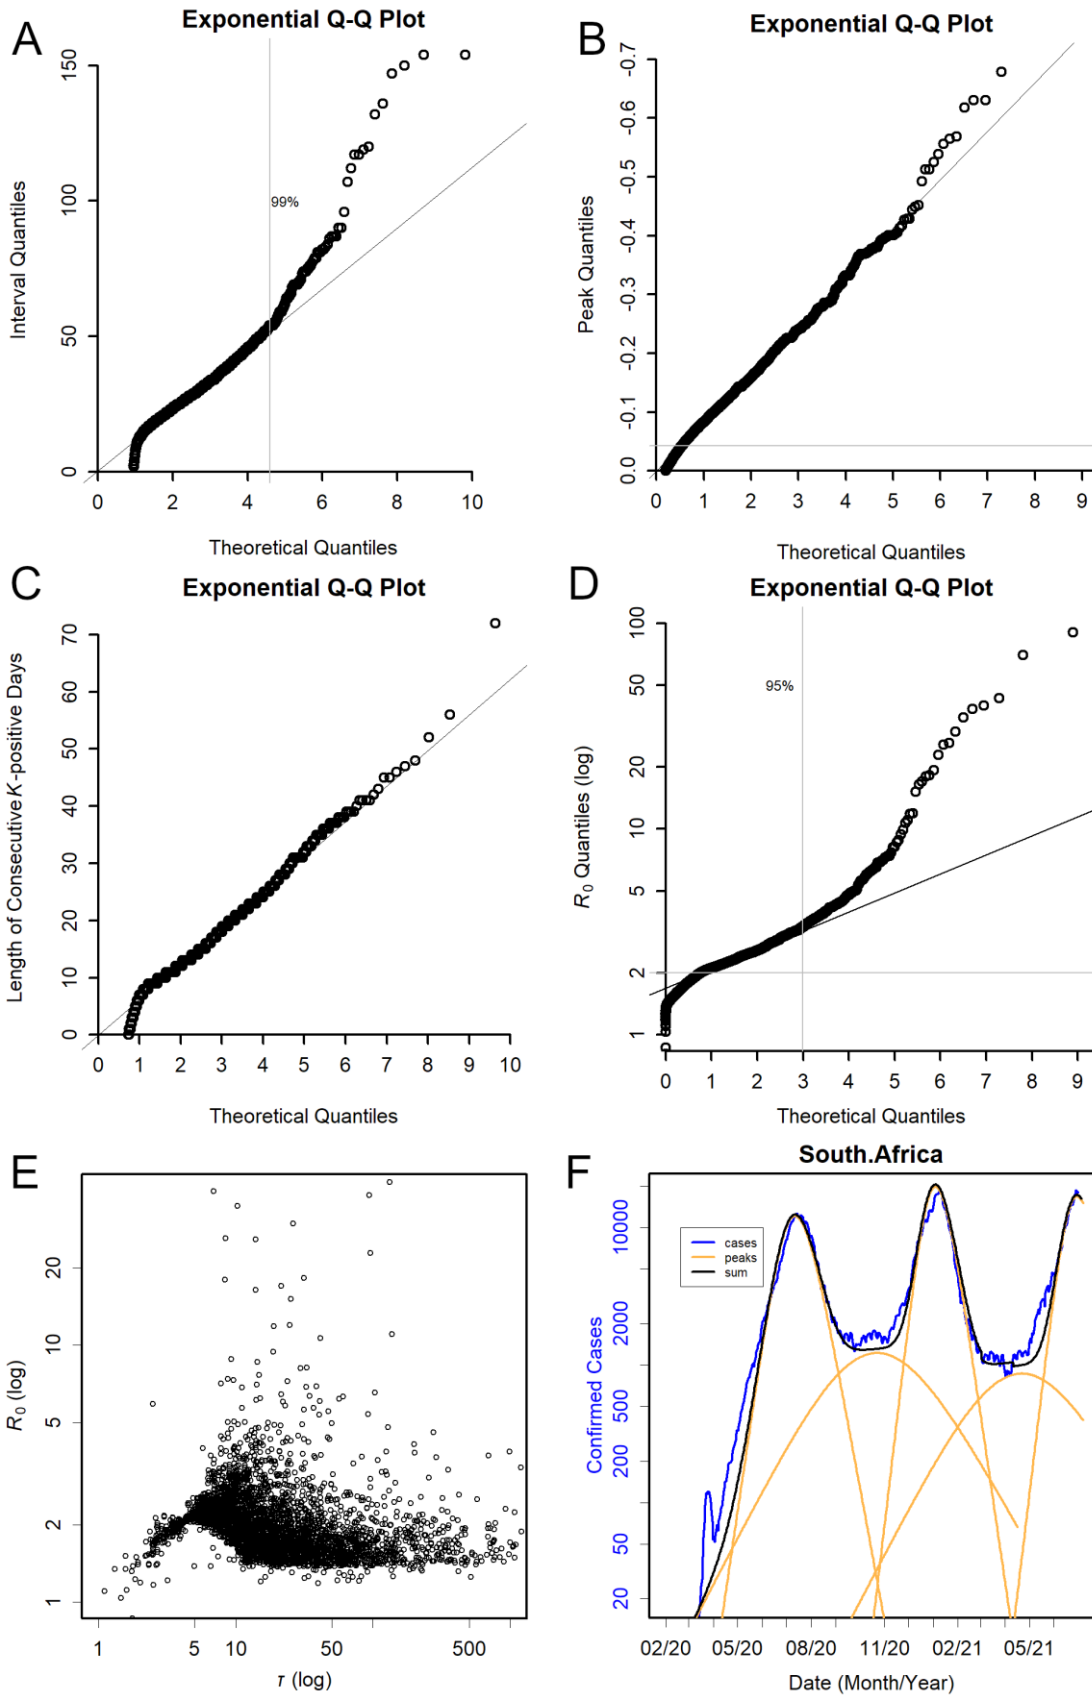

638

639

640

641 Fig. 4 Distributions of peak-related values. **(A)** Correspondence of quantiles of the intervals  
642 between the peaks with that of the exponential distribution. If data obey this distribution, a  
643 straight line is observed. The slope of the regression line was 11.3; this equals the mean and  
644 standard deviation of the distribution. The vertical grey line, which presents the upper limit of  
645 coincidence with the theoretical values, shows the percentile indicated. **(B)** Negative peaks of  $K$ .  
646 The horizontal grey line shows the upper limit of linear correlation; note that the y-axis is  
647 reversed. **(C)** Consecutive  $K$ -positive days. The slope was 6.2 days. **(D)** Estimated values of  $R_0$ ,  
648 semi-log plot. **(E)** Relationship between  $\tau$  and  $R_0$ . When  $\tau$  were small,  $R_0$  was always small, and  
649 when  $R_0$  was large,  $\tau$  was large. **(F)** Approximation of the confirmed cases by using estimated  $R_0$   
650 and  $\tau$ .

651

652

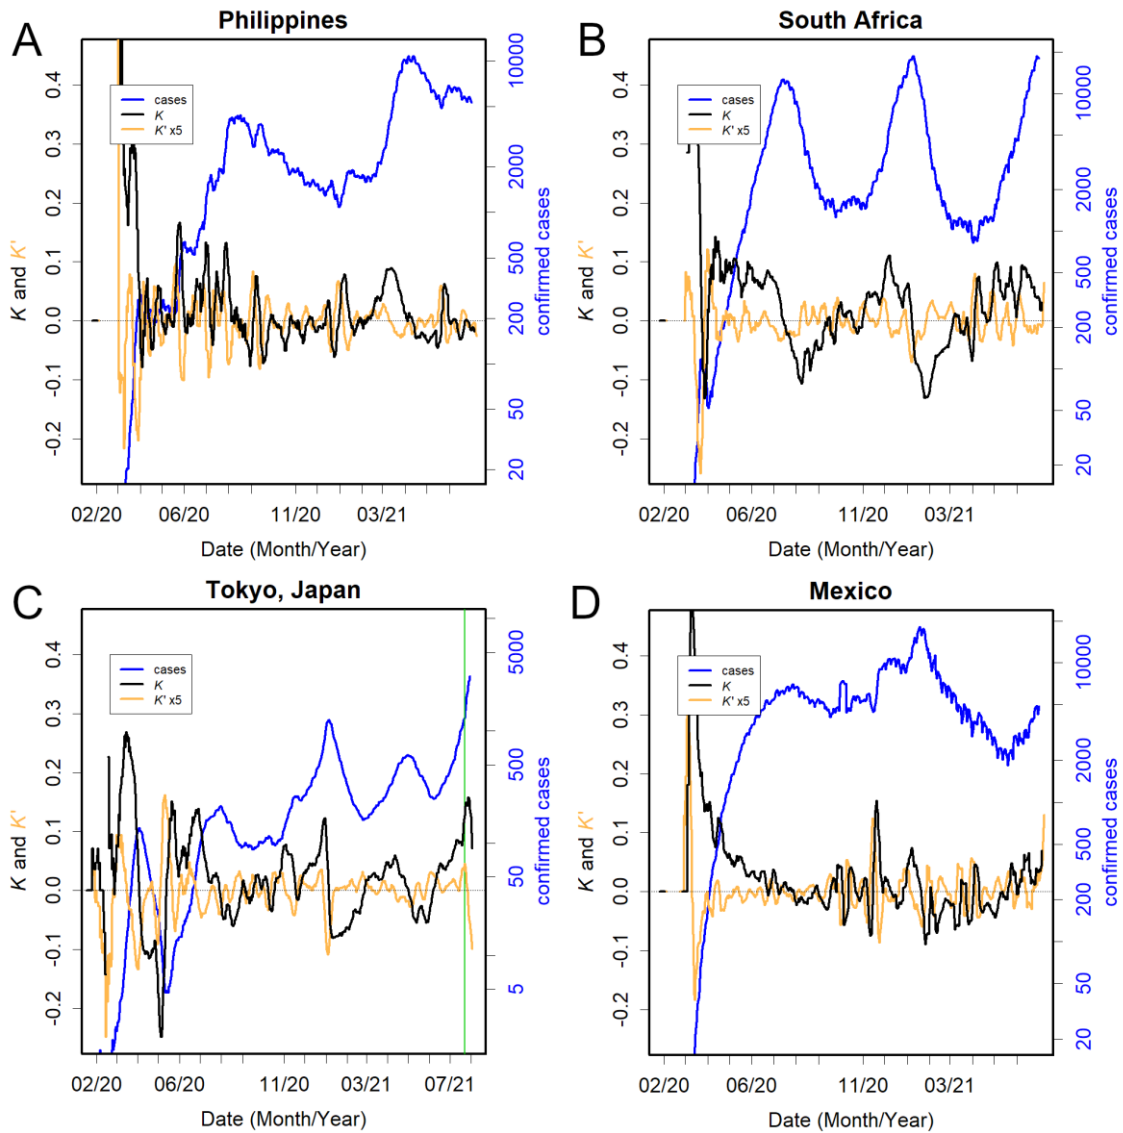

653

654 Fig. 5 Actual data, a typical example of continuum of positive  $K$ . (A) The Philippines, (B) South  
655 Africa, (C) Tokyo (Japan), and (D) Mexico.

656

657

658

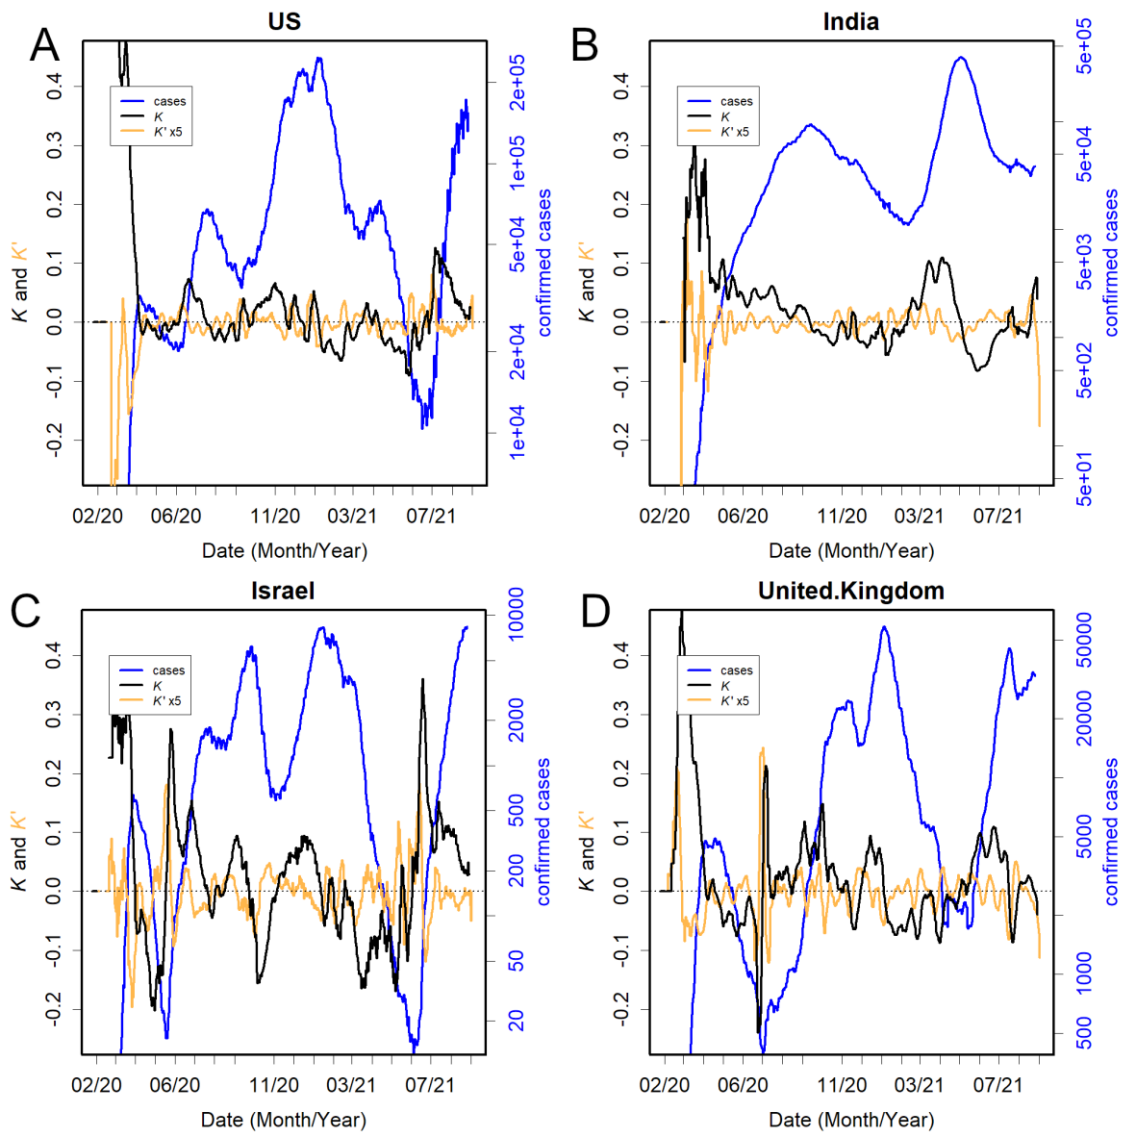

659

660 Fig. 6 Countries with long-positive  $K$ . 2. (A) USA, (B) India, (C) Israel, and (D) UK. Vaccination  
661 coverage (2 doses) in these countries was 47%, 4%, 57%, and 49%, respectively (Our World in  
662 Data 2021, P 5 July).

663

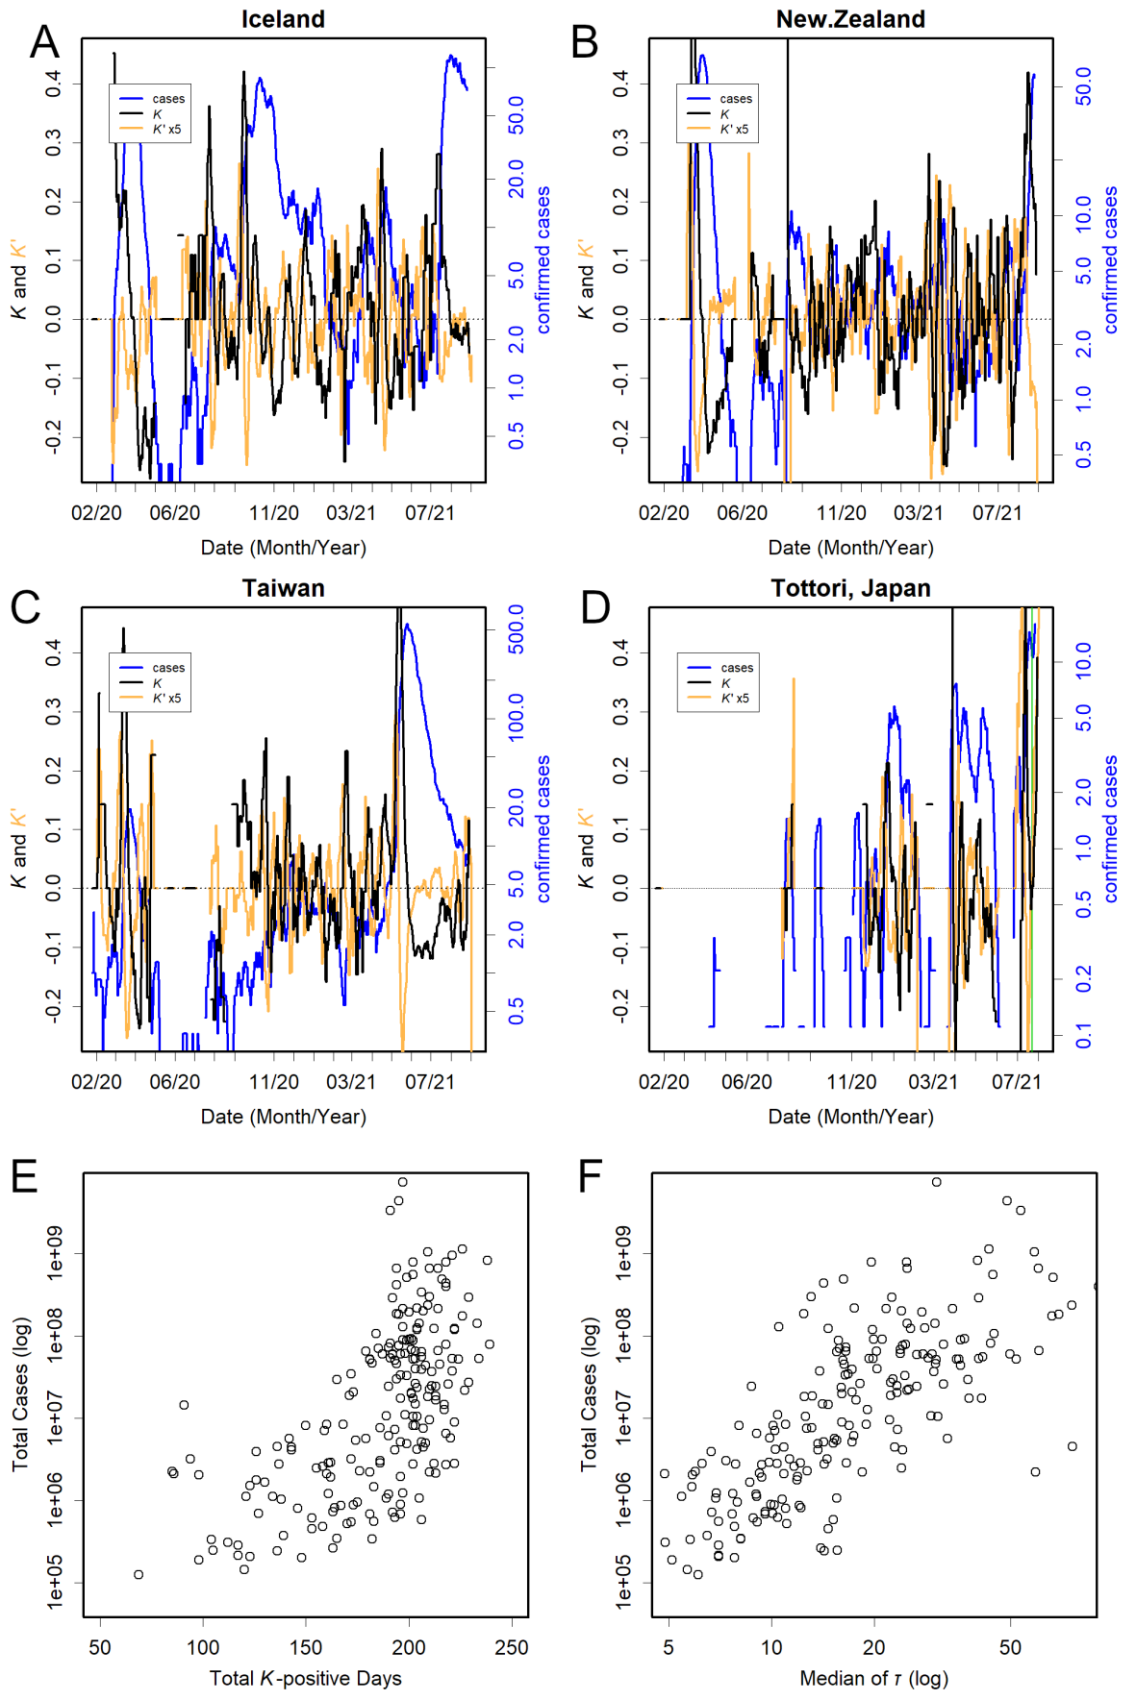

665 Fig. 7 Regions with infections under control. (A) Iceland, (B), Taiwan, (C) New Zealand, and (D)  
666 Tottori, Japan. Relationships between the number of total confirmed cases and total  $K$ -positive  
667 days (E), and median of  $\tau$  (F). Pearson's correlation coefficient,  $r = 0.80$  and  $0.66$ , respectively.  
668

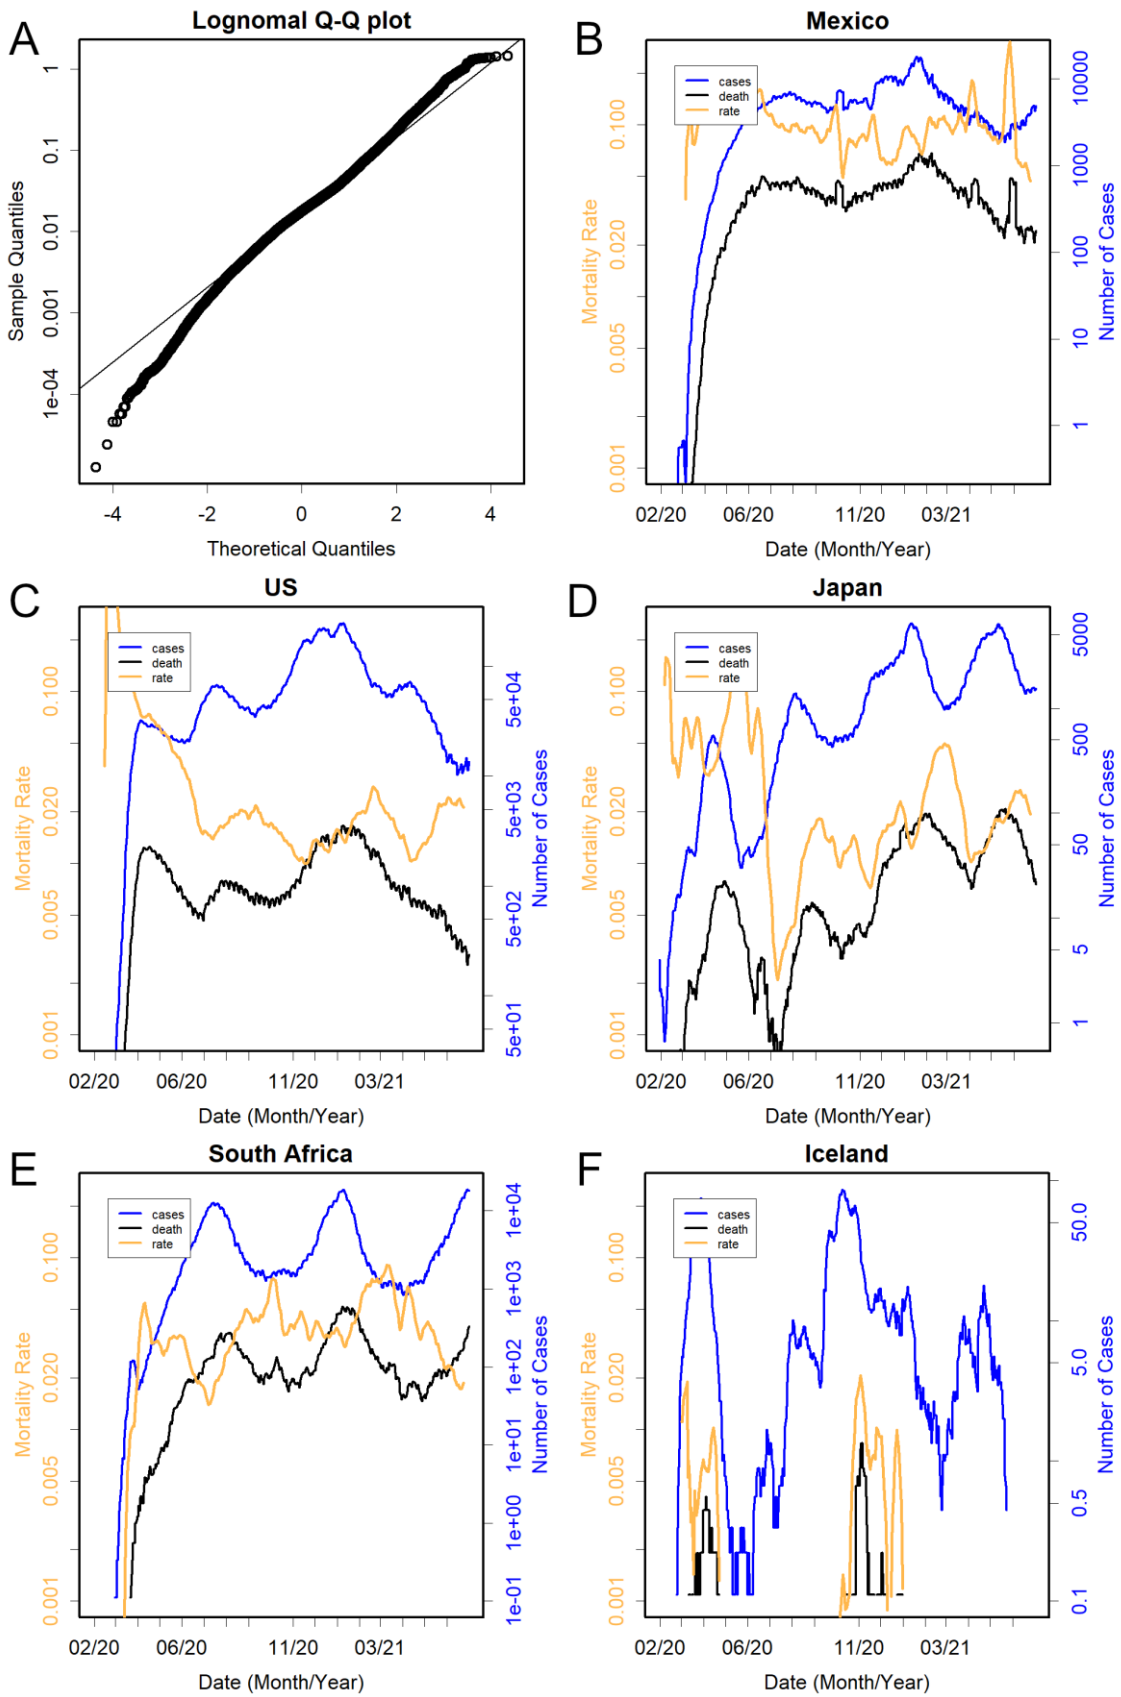



670

671 Fig. 8 Number of deaths (black) and mortality rate. (A) Normal QQ plot of the logarithm of the  
672 mortality rate. (B-F) Situation in each country. Semi-log plot.

673

674

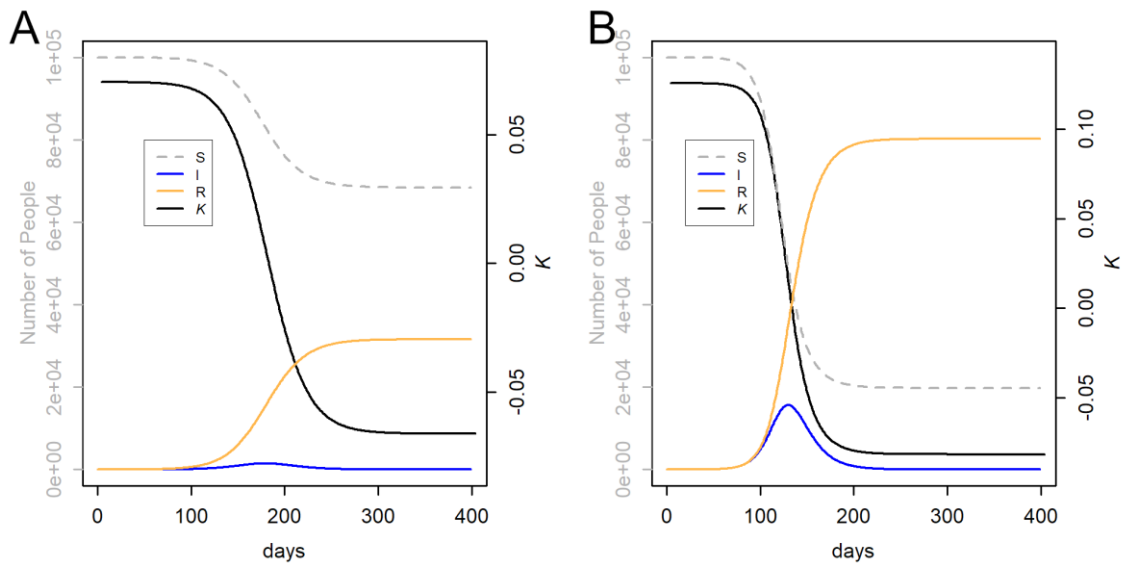

675

676

677 Fig. S1. Simulation under different  $R_0$ . (A) Close to the limit of exponential amplification:  $R_0 =$

678 2.1,  $\tau = 15$ . Ca. 70% of  $S_0$  remained uninfected, and the peak of  $I$  remained low. (B) Changes

679 under average conditions:  $R_0 = 2.9$ ,  $\tau = 12$ . Ca. 20% of  $S_0$  remained uninfected.

680

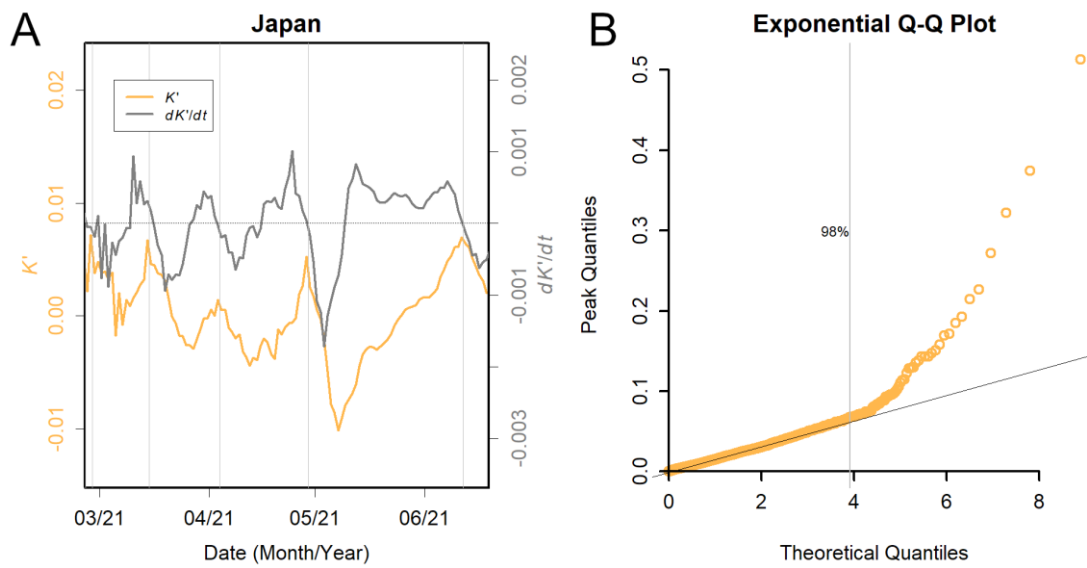

681  
682  
683  
684  
685  
686  
687  
688  
689

Fig. S2 Examples of data. **(A)** Relationship between  $K'$  and  $dK'/dt$ . The peak of  $K'$  appears when  $dK'/dt$  becomes negative. Grey vertical lines show the positions of the found peaks. **(B)** Distribution of  $K'$  peaks. Correspondence of quantiles of the peaks with that of the theoretical values. The top 2% of data may represent the effects of the super spreaders and newest infectious variants.

690

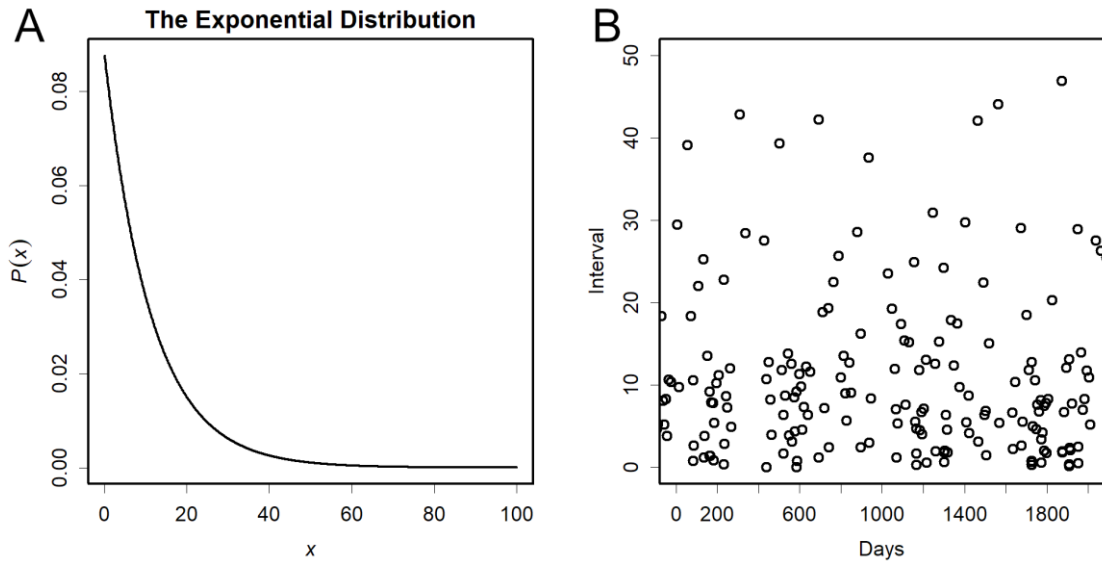

691

692

693 Fig. S3 Exponential distribution. (A) Probability density function,  $rate = 1/11.3$ . The density  
694 decreases exponentially. (B) Frequency of intervals. A random exponential distribution with  
695  $ratio = 1/11.3$  was generated, where the vertical axis shows the respective value and the  
696 horizontal axis the total up to that value; higher values occur after such intervals of horizontal  
697 axis. Intervals of more than 40 days are observed several times over the course of 400 days.

698

699

700

701

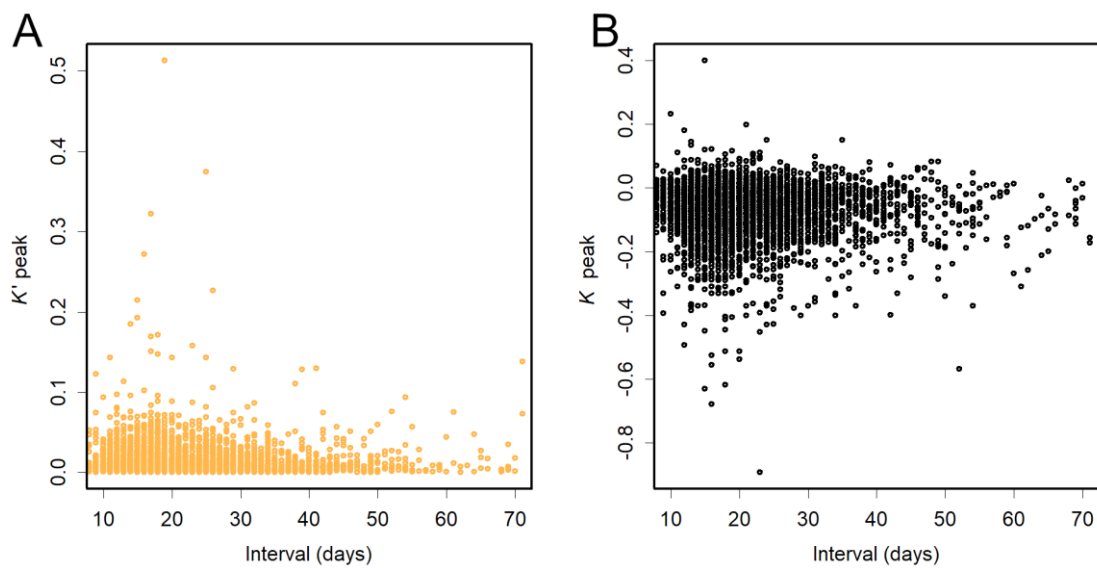

702

703

704 Fig. S4

705 Relationship between the intervals of peaks and peak heights. (A) Peak of  $K'$ . Pearson's

706 correlation coefficient,  $r = -0.052$ . (B) Negative peak of  $K$ . Pearson's correlation coefficient,  $r =$

707  $-0.022$ .

708

709

710 Table S1 (TableS1.xlsx)

711 Calculation of  $K$  in Tokyo. By using this table,  $K$  can be estimated easily.

712

713

|                        | Tokyo    | Tottori  | Japan    | England  | US       | Iceland  | New Zealand |
|------------------------|----------|----------|----------|----------|----------|----------|-------------|
| Mean Infectious Time   | 18       | 3        | 11       | 13       | 30       | 6        | 8           |
| Population             | 1.4.E+07 | 5.7.E+05 | 1.3.E+08 | 6.7.E+07 | 3.3.E+08 | 3.6.E+05 | 4.9.E+06    |
| Confirmed Cases        | 1.2.E+05 | 4.9.E+02 | 8.1.E+05 | 5.0.E+06 | 3.4.E+07 | 6.6.E+03 | 2.8.E+03    |
| Death                  | 2.2.E+03 | 2.0.E+00 | 1.5.E+04 | 1.3.E+05 | 6.1.E+05 | 2.9.E+01 | 2.6.E+01    |
| Infection / Population | 8.5.E-03 | 8.6.E-04 | 6.4.E-03 | 7.4.E-02 | 1.0.E-01 | 1.8.E-02 | 5.6.E-04    |
| Death / Population     | 1.6.E-04 | 3.5.E-06 | 1.2.E-04 | 1.9.E-03 | 1.9.E-03 | 8.1.E-05 | 5.3.E-06    |
| Death / Infection      | 1.9.E-02 | 4.1.E-03 | 1.9.E-02 | 2.6.E-02 | 1.8.E-02 | 4.4.E-03 | 9.4.E-03    |

714

715 Table S2

716 Numbers and rates of infections and deaths up to 6 July 2021. Exponential notation. The mean  
717 infectious time is the median of the series of estimated  $\tau$ .

718

719

720
